# Supplementary material
Source: MDPI journal article supplement (https://www.mdpi.com/2075-5309/14/1/69)

**Figure S1.** XRPD results for each group of samples.

Group 1 – VIR1

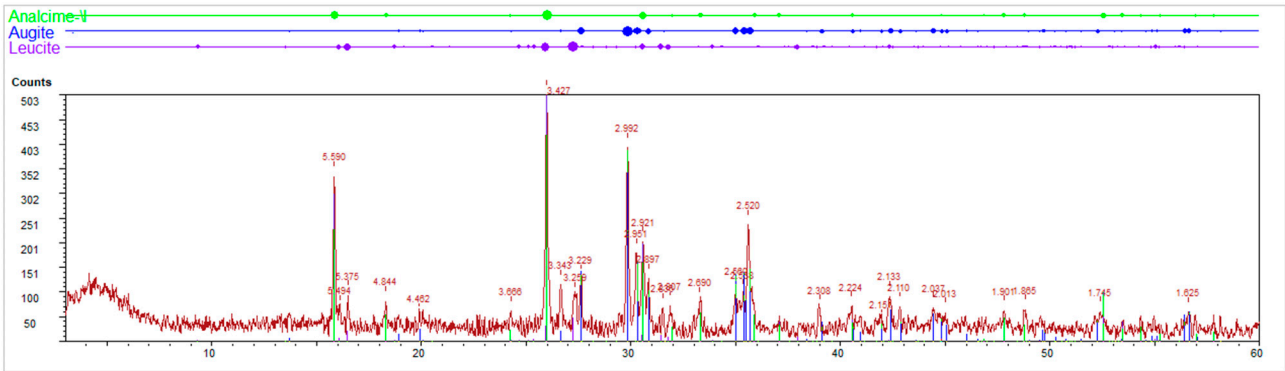

Group 2 – VIR3

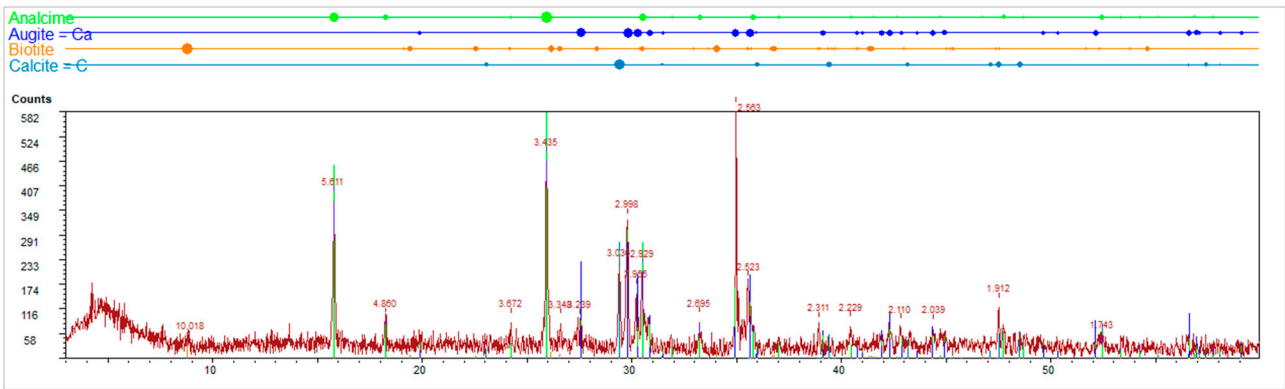

Group 3 – VIR5

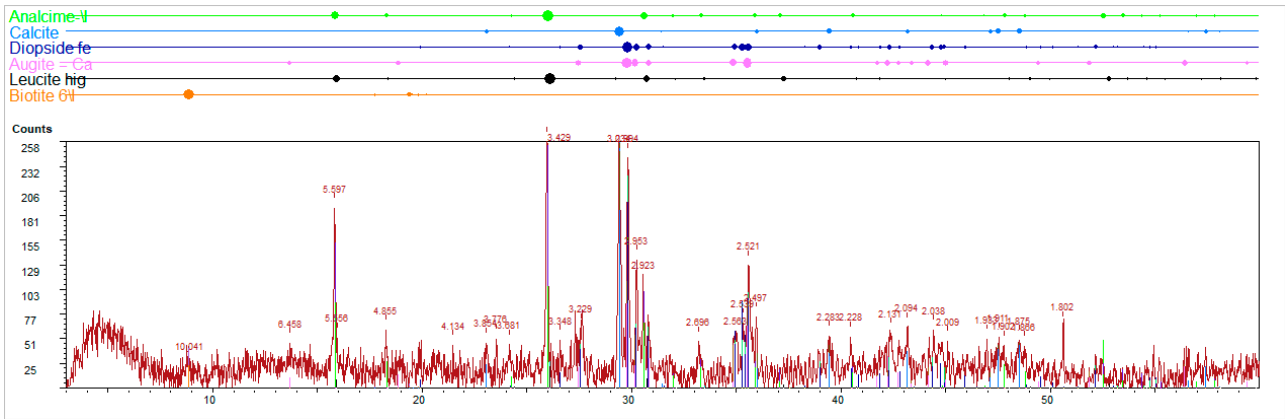

Group 4 – VIR7

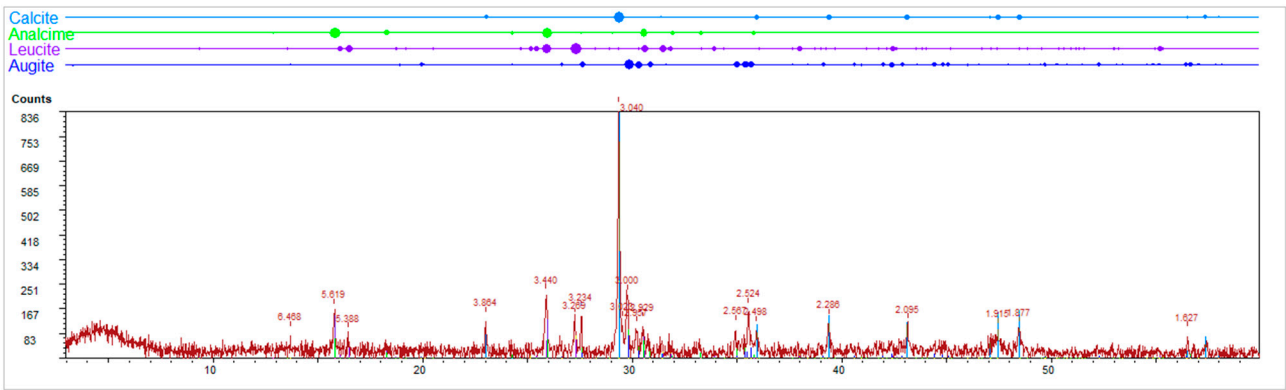

Group 5 – VIR8

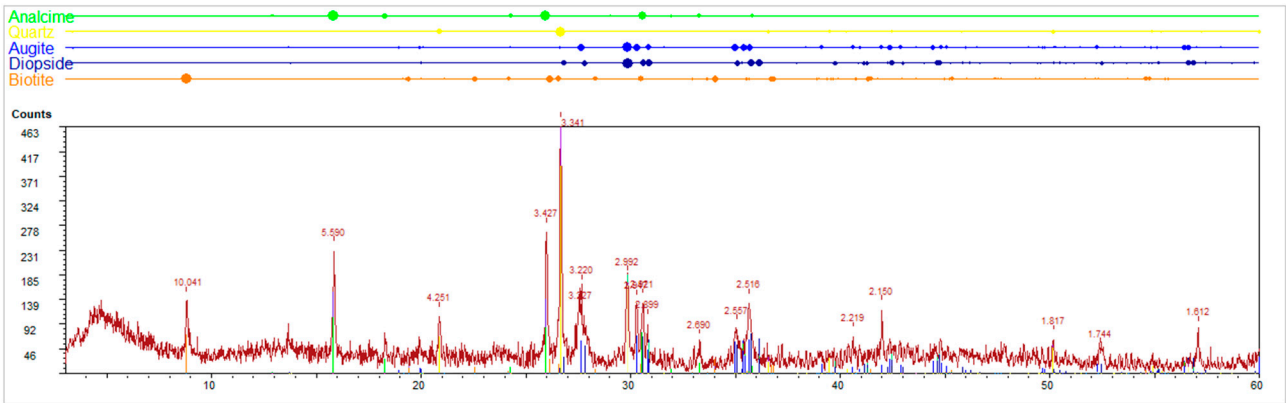

Group 6 – VIR10

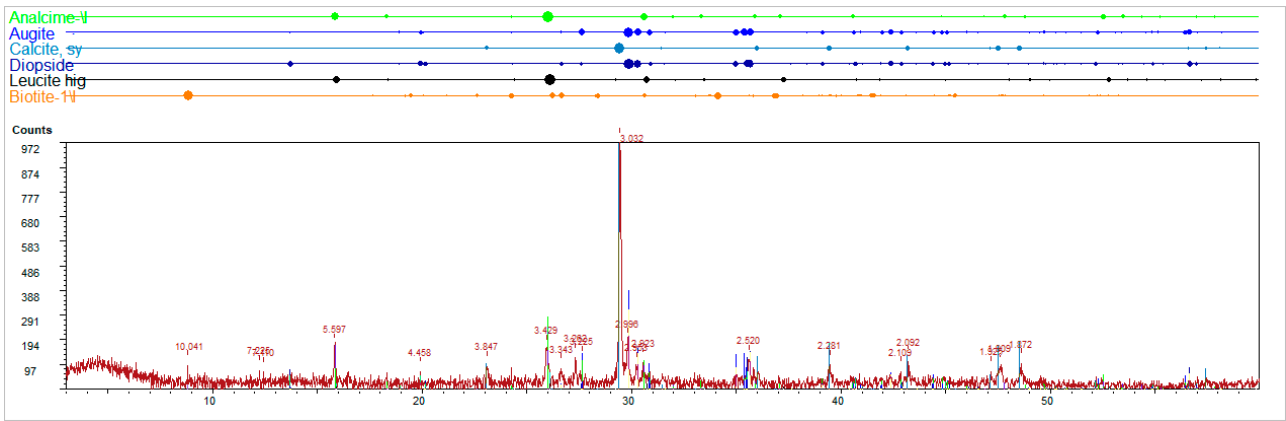

Group 7 – VIR11

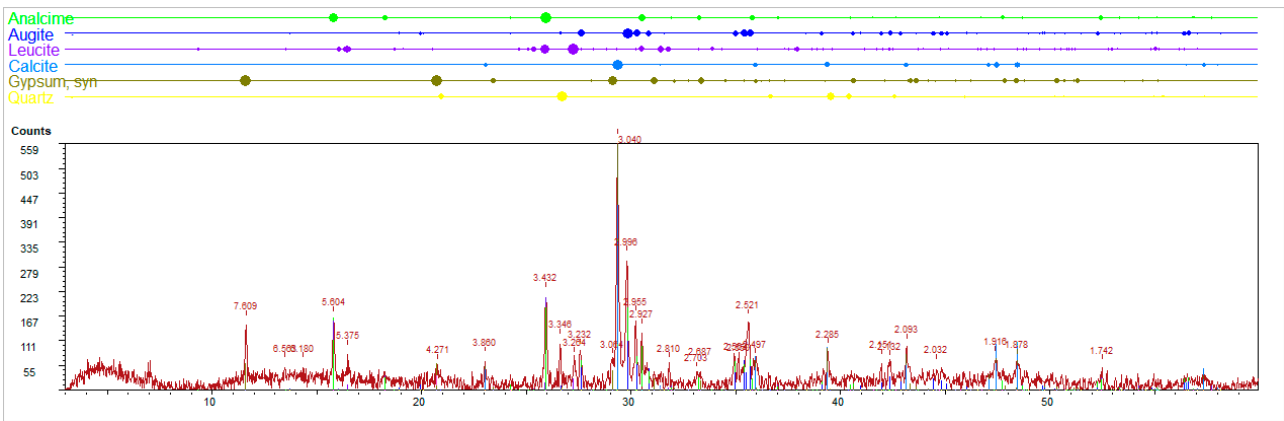

Group 8 – VIR13

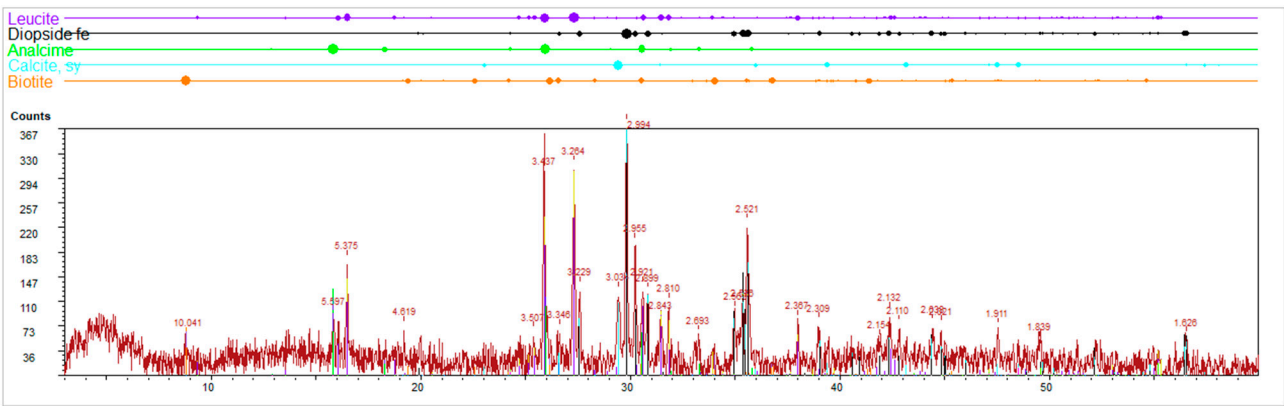

Group 9 – VIR16

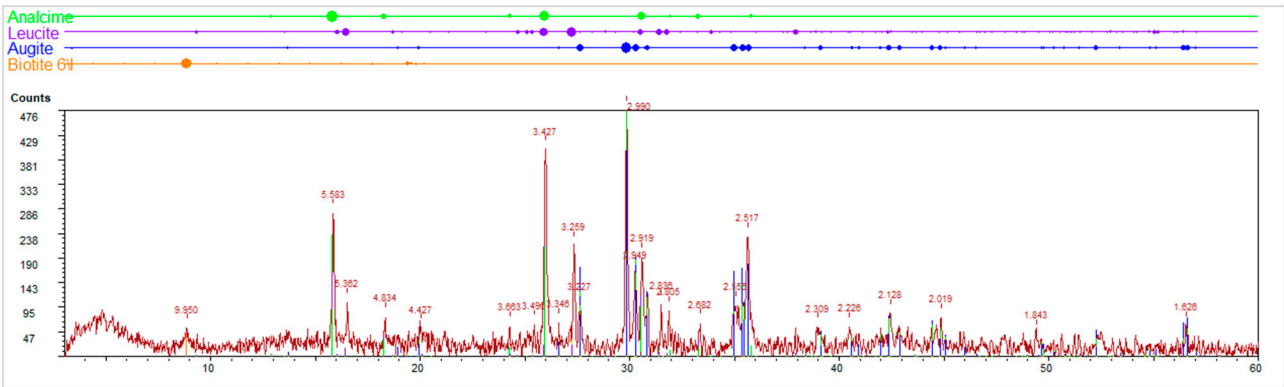

Group 10 – VIR17

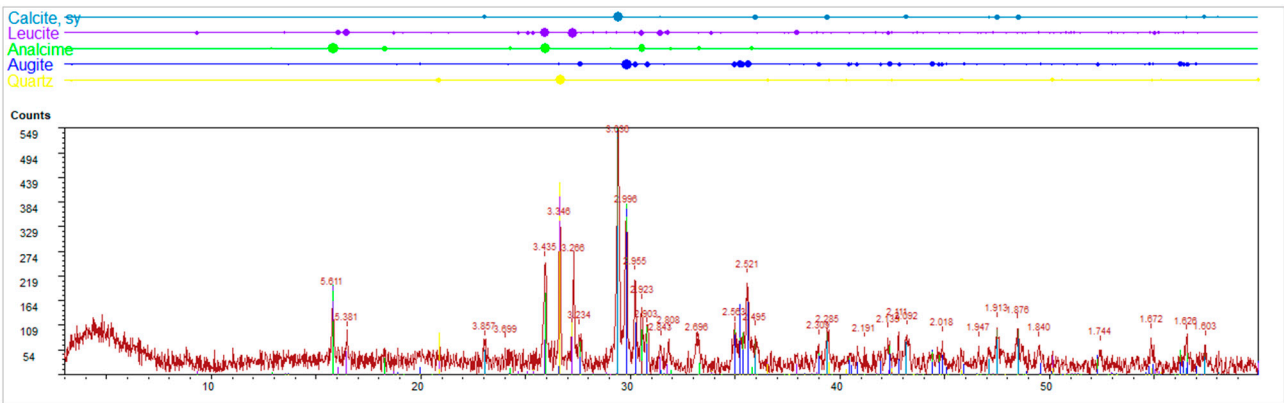

Group 11 – VIR2

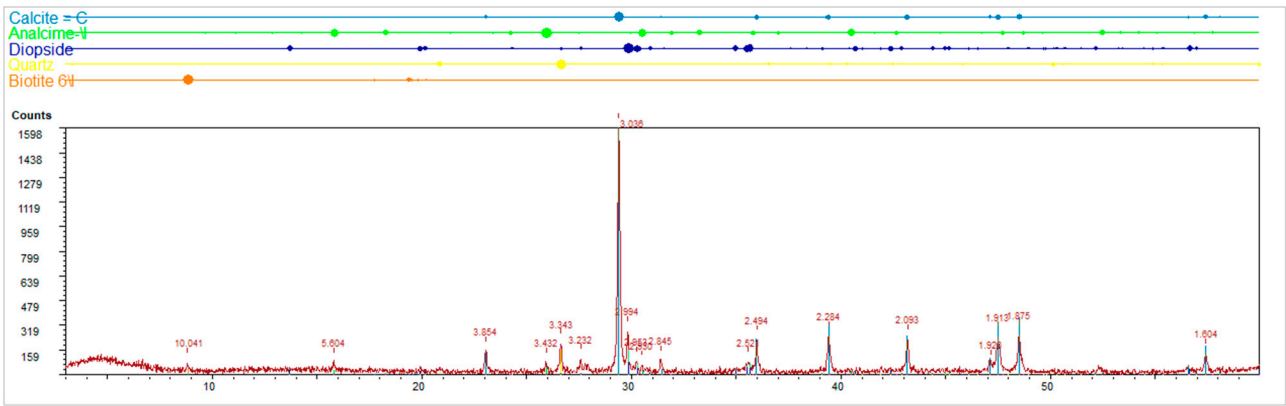

Supplement: s1 [file s1]
