# Supplementary material
Source: MDPI journal article supplement (https://www.mdpi.com/2075-5309/14/1/69)
Supplement: s1 [file s1]

Archive with 4 entries (4 files):
- Figure S1_new.pdf
- Figure S2_rev.pdf
- Table S1_rev.pdf
- Table S2.pdf
